# Supplementary material for: Pre-Operative Assessment of Micronutrients, Amino Acids, Phospholipids and Oxidative Stress in Bariatric Surgery Candidates
Source: MDPI journal article supplement (doi:10.3390/antiox11040774), 2022-04-13

**Supplemental Table S1: Vitamin D analysis by UPLC-MS/MS****MRM transitions and parameters for vitamin D analysis**

| Analyte     | Retention time [min] | MRM Transition | Cone Voltage (V) | Collision Energy (eV) |
|-------------|----------------------|----------------|------------------|-----------------------|
| 25-OH-D3    | 4.98                 | 401.3 > 365.3* | 8                | 10                    |
|             |                      | 401.3 > 159.1  | 8                | 26                    |
|             |                      | 401.3 > 389.3  | 8                | 8                     |
| d6-25-OH-D3 | 4.98                 | 407.3 > 371.3* | 10               | 10                    |
|             |                      | 407.3 > 389.3  | 10               | 8                     |

\* Quantifier

**Accuracy:**

Accuracy was assessed by analyzing NIST Standard Reference Material 972a and comparing the calculated concentrations with the certified values. Each reference value was measured as triplicate (Level 1-4).

| Concentration Level | Certified Concentration [nM] | SD [nM] | Measured concentration [nM] | SD [nM] | Deviation [%] |
|---------------------|------------------------------|---------|-----------------------------|---------|---------------|
| 1                   | 76.3*                        | 2.9     | 78.4                        | 1.7     | 3.8           |
| 2                   | 48.3*                        | 1.2     | 52.2                        | 1.0     | 2.9           |
| 3                   | 52.4*                        | 1.5     | 54.2                        | 1.0     | 2.5           |
| 4                   | 138.2*                       | 7.7     | 144.9                       | 2.8     | 5.6           |

\*Values represent combined values of 25-OH-D3 and epi-25-OH-D3

**Precision:** For determination of intra-day and inter-day as well as inter-week precision plasma samples from three healthy individuals showing significantly different 25-OH-D3 serum levels were measured over a 3-week period.

| Precision data for the LC-MS/MS analysis of 25-OH vitamin D <sub>3</sub> |                   |      |                   |      |                     |      |
|--------------------------------------------------------------------------|-------------------|------|-------------------|------|---------------------|------|
|                                                                          | Intra-day (n =3)  |      | Inter-day (n = 9) |      | Inter-week (n = 27) |      |
| Concentration Level                                                      | Mean (SD), nmol/L | CV % | Mean (SD), nmol/L | CV % | Mean (SD), nmol/L   | CV % |
| Low                                                                      | 13.4 (0.2)        | 1.5  | 12.9 (0.5)        | 3.7  | 13.0 (0.5)          | 4.1  |
| Mid                                                                      | 35.8 (1.3)        | 3.7  | 36.5 (1.3)        | 3.5  | 37.8 (2.0)          | 5.4  |
| High                                                                     | 63.7 (0.8)        | 1.3  | 62.4 (1.7)        | 2.8  | 64.0 (2.3)          | 3.7  |

**Supplemental Table S2: Amino acid analysis by UPLC-MS/MS****MRM transitions and parameters for AA analysis**

| Analyte                                                    | Retention time [min] | MRM Transition | Internal Standard (IS)                                     | Cone Voltage (V) | Collision Energy (eV) |
|------------------------------------------------------------|----------------------|----------------|------------------------------------------------------------|------------------|-----------------------|
| Leucine                                                    | 3.36                 | 132.1 > 86.1   | Leucine- <sup>13</sup> C <sub>6</sub> , N <sup>15</sup>    | 20               | 10                    |
| Leucine- <sup>13</sup> C <sub>6</sub> , N <sup>15</sup>    | 3.36                 | 139.1 > 92.1   |                                                            | 22               | 8                     |
| Phenylalanine                                              | 3.38                 | 166.1 > 120.1  | Phenyl- <sup>13</sup> C <sub>6</sub> -alanine              | 12               | 12                    |
| Phenyl- <sup>13</sup> C <sub>6</sub> -alanine              | 3.38                 | 172.1 > 126.1  |                                                            | 12               | 14                    |
| Tryptophan                                                 | 3.53                 | 205.1 > 188.1  | Phenyl- <sup>13</sup> C <sub>6</sub> -alanine              | 10               | 10                    |
| Isoleucine                                                 | 3.68                 | 132.1 > 86.1   | Isoleucine- <sup>13</sup> C <sub>6</sub> , N <sup>15</sup> | 20               | 10                    |
| Isoleucine- <sup>13</sup> C <sub>6</sub> , N <sup>15</sup> | 3.68                 | 139.1 > 92.1   |                                                            | 22               | 8                     |
| Methionine                                                 | 4.54                 | 150.0 > 56.0   | Methionine- <sup>13</sup> C <sub>5</sub> <sup>15</sup> N   | 20               | 14                    |
| Methionine- <sup>13</sup> C <sub>5</sub> <sup>15</sup> N   | 4.54                 | 156.0 > 60.0   |                                                            | 24               | 14                    |
| Valine                                                     | 4.91                 | 118.1 > 72.0   | Valine- <sup>13</sup> C <sub>5</sub>                       | 14               | 10                    |
| Valine- <sup>13</sup> C <sub>5</sub>                       | 4.91                 | 123.1 > 76.0   |                                                            | 16               | 8                     |
| Proline                                                    | 5.24                 | 116.0 > 70.1   | Proline- <sup>13</sup> C <sub>5</sub>                      | 20               | 12                    |
| Proline- <sup>13</sup> C <sub>5</sub>                      | 5.24                 | 121.1 > 74.0   |                                                            | 22               | 12                    |
| Threonine                                                  | 5.73                 | 120.1 > 74.0   | Threonine- <sup>13</sup> C <sub>4</sub>                    | 14               | 10                    |
| Threonine- <sup>13</sup> C <sub>4</sub>                    | 5.73                 | 124.1 > 77.0   |                                                            | 16               | 8                     |
| 3-Methylhistidine                                          | 6.23                 | 170.1 > 124.0  | 3-Methylhistidine-d3                                       | 10               | 14                    |
| 3-Methylhistidine-d3                                       | 6.23                 | 173.1 > 127.0  |                                                            | 10               | 14                    |
| 1-Methylhistidine                                          | 6.52                 | 170.1 > 96.1   | 3-Methylhistidine-d3                                       | 10               | 18                    |
| Histidine                                                  | 6.53                 | 156.1 > 110.1  | Histidine- <sup>13</sup> C <sub>6</sub>                    | 10               | 14                    |
| Histidine- <sup>13</sup> C <sub>6</sub>                    | 6.53                 | 162.1 > 115.1  |                                                            | 10               | 14                    |
| Arginine                                                   | 6.53                 | 175.1 > 70.1   | Arginine- <sup>13</sup> C <sub>6</sub>                     | 32               | 18                    |
| Arginine- <sup>13</sup> C <sub>6</sub>                     | 6.58                 | 181.2 > 74.0   |                                                            | 30               | 20                    |
| Lysine                                                     | 6.67                 | 147.0 > 84.0   | Lysine- <sup>13</sup> C <sub>6</sub>                       | 10               | 16                    |
| Lysine- <sup>13</sup> C <sub>6</sub>                       | 6.67                 | 153.1 > 89.0   |                                                            | 10               | 16                    |

**Accuracy:** Accuracy was assessed by measuring NIST SRM 1950 and comparing the calculated concentrations with the certified concentrations. Measured concentrations and standard deviations are expressed as a mean resulting from 24 measurements.

| Accuracy for AA measurements |                              |         |                                         |         |               |
|------------------------------|------------------------------|---------|-----------------------------------------|---------|---------------|
| Analyte                      | Certified concentration [μM] | SD [μM] | Measured concentration [μM] (mean n=24) | SD [μM] | Deviation [%] |
| Leucine                      | 100.4                        | 6.4     | 95.5                                    | 9.8     | - 4.9         |
| Phenylalanine                | 51.0                         | 7.0     | 49.4                                    | 3.2     | -3.2          |
| Isoleucine                   | 55.5                         | 3.4     | 49.6                                    | 5.1     | -10.7         |
| Methionine                   | 22,3                         | 1.8     | 20.1                                    | 1.6     | -9.9          |
| Valine                       | 182.2                        | 10.4    | 181.8                                   | 15.9    | -0.3          |
| Proline                      | 177.0                        | 9.0     | 170.4                                   | 14.7    | -3.8          |
| Threonine                    | 119.5                        | 6.1     | 104.5                                   | 10.4    | -12.6         |
| Histidine                    | 72.6                         | 3.6     | 72.7                                    | 6.7     | 0.1           |
| Arginine                     | 81.4                         | 2.3     | 91.7                                    | 8.4     | 12.6          |
| Lysine                       | 140.0                        | 14.0    | 140.5                                   | 8.9     | 0.1           |

**Precision:** Inter-assay precision was assessed by measuring 6 replicates of the reference plasma (NIST 1950) once a week for 4 weeks (n = 24) Intra-assay coefficients of variation (CVs) for BCAAs were in the range of 3.0 – 6.5 % for fixed reference concentrations while inter-assay CVs ranged from 6.3 to 10.4 %.

| Intra- and Inter-assay precision assessment for AA measurements |                           |                          |                           |
|-----------------------------------------------------------------|---------------------------|--------------------------|---------------------------|
| Analyte                                                         | Concentration [mg/L] (SD) | Intra-assay CV n = 6 [%] | Inter-assay CV n = 24 [%] |
| Leucine                                                         | 13.17 (0.84)              | 6.1                      | 10.3                      |
| Phenylalanine                                                   | 8.37 (1.12)               | 3.3                      | 6.5                       |
| Isoleucine                                                      | 7.28 (0.43)               | 5.8                      | 10.4                      |
| Methionine                                                      | 3.33 (0.27)               | 3.9                      | 8.1                       |
| Valine                                                          | 21.34 (1.21)              | 5.7                      | 8.8                       |
| Proline                                                         | 20.31 (1.12)              | 2.5                      | 8.6                       |
| Threonine                                                       | 14.23 (0.71)              | 6.5                      | 9.9                       |
| Histidine                                                       | 11.27 (0.56)              | 4.5                      | 9.2                       |
| Arginine                                                        | 14.18 (0.41)              | 3.5                      | 9.1                       |
| Lysine                                                          | 20.42 (1.94)              | 3.0                      | 6.3                       |
| Tryptophan                                                      | 9.64 (0.76)               | 4.4                      | 7.9                       |
| 1-Methylhistidine                                               | 0.88 (0.08)               | 2.0                      | 8.8                       |
| 3-Methylhistidine                                               | 1.34 (0.13)               | 2.6                      | 9.9                       |

**Supplemental Table S3: Correlations between fat mass and biomarkers**

|                                                 | Fat mass (kg) | P-value      |
|-------------------------------------------------|---------------|--------------|
| <b>Visceral adipose tissue <sup>1</sup></b>     |               |              |
| MDA                                             | 0.662         | <b>0.010</b> |
| <b>Subcutaneous adipose tissue <sup>1</sup></b> |               |              |
| MDA                                             | 0.647         | <b>0.012</b> |
| Retinol [μmol/kg]                               | 0.555         | <b>0.039</b> |
| <b>Plasma <sup>2</sup></b>                      |               |              |
| β-Carotene                                      | -0.384        | <b>0.040</b> |
| Retinol                                         | -0.558        | <b>0.002</b> |
| Retinol/Cholesterol                             | -0.369        | <b>0.049</b> |
| Cholesterol                                     | -0.412        | <b>0.026</b> |
| Lysine [μM]                                     | 0.389         | <b>0.037</b> |
| 1-MH                                            | -0.468        | <b>0.011</b> |

<sup>1</sup> n = 14, <sup>2</sup> n = 29; Pearson correlation (transformed values were used)

**Supplemental Figure S1: Correlation between MDA tissue concentrations and fat mass**

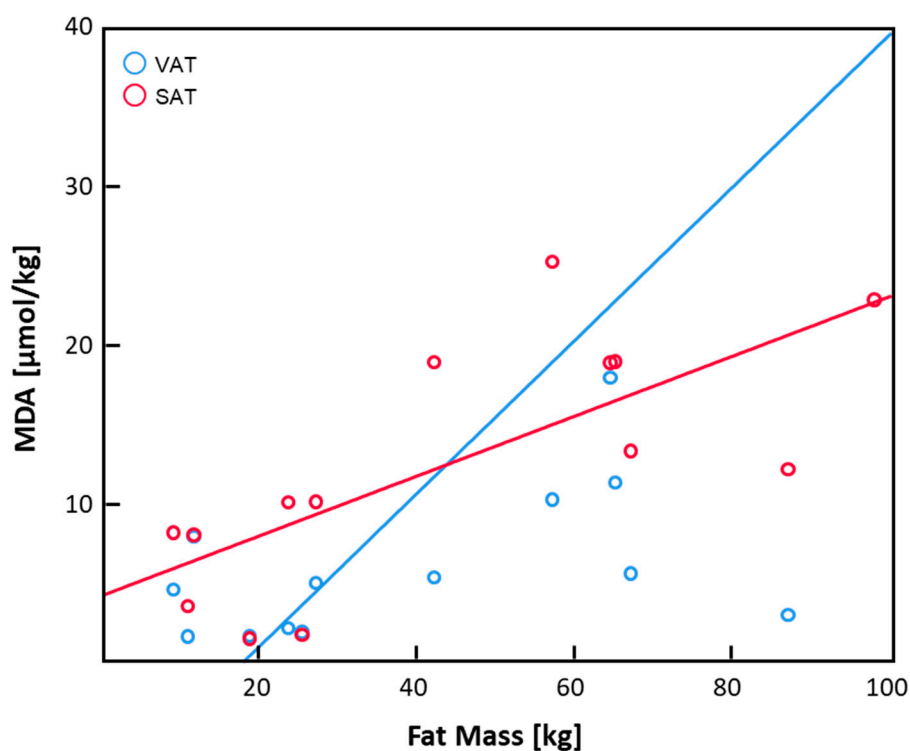

Supplement: s1 [file s1]
